# Supplementary material for: Long-read RNA sequencing reveals allele-specific N 6 -methyladenosine modifications
Source: HighWire-hosted journal article supplement (doi:10.1101/gr.279270.124), 2024-10-29
Supplement: Supplemental_Fig_2.pdf [file Supplemental_Fig_2.pdf]

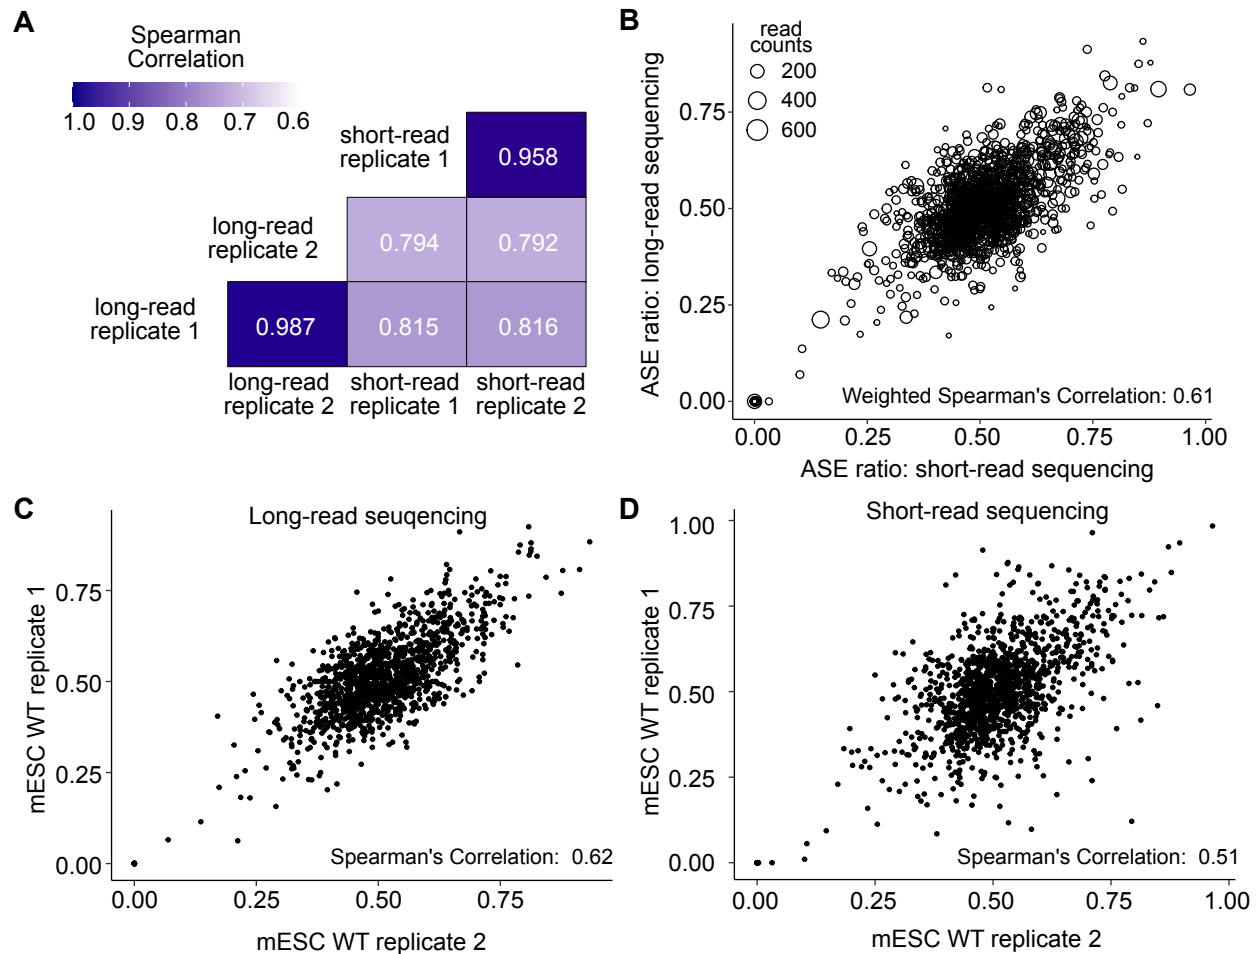

**Supplemental Figure. 2 | ASE ratio correlation between long-read and short-read sequencing.**

A Per transcript RNA expression was calculated by counts per million normalization and compared. B) Transcript-level Allele-Specific Expression (ASE) ratios were calculated and plotted using CAST allele ratio (CAST read counts) / (CAST read counts + B6 read counts). The correlation between estimated ASE ratio was calculated between long-read and short-read sequencing using the mean of the replicates weighted by read counts from long-read sequencing (depicted with the size of the circles). The correlation between replicates from each method exhibited similar correlation levels (C, D).
