# Supplementary material for: Long-read RNA sequencing reveals allele-specific N 6 -methyladenosine modifications
Source: HighWire-hosted journal article supplement (doi:10.1101/gr.279270.124), 2024-10-29
Supplement: Supplemental_Fig_3.pdf [file Supplemental_Fig_3.pdf]

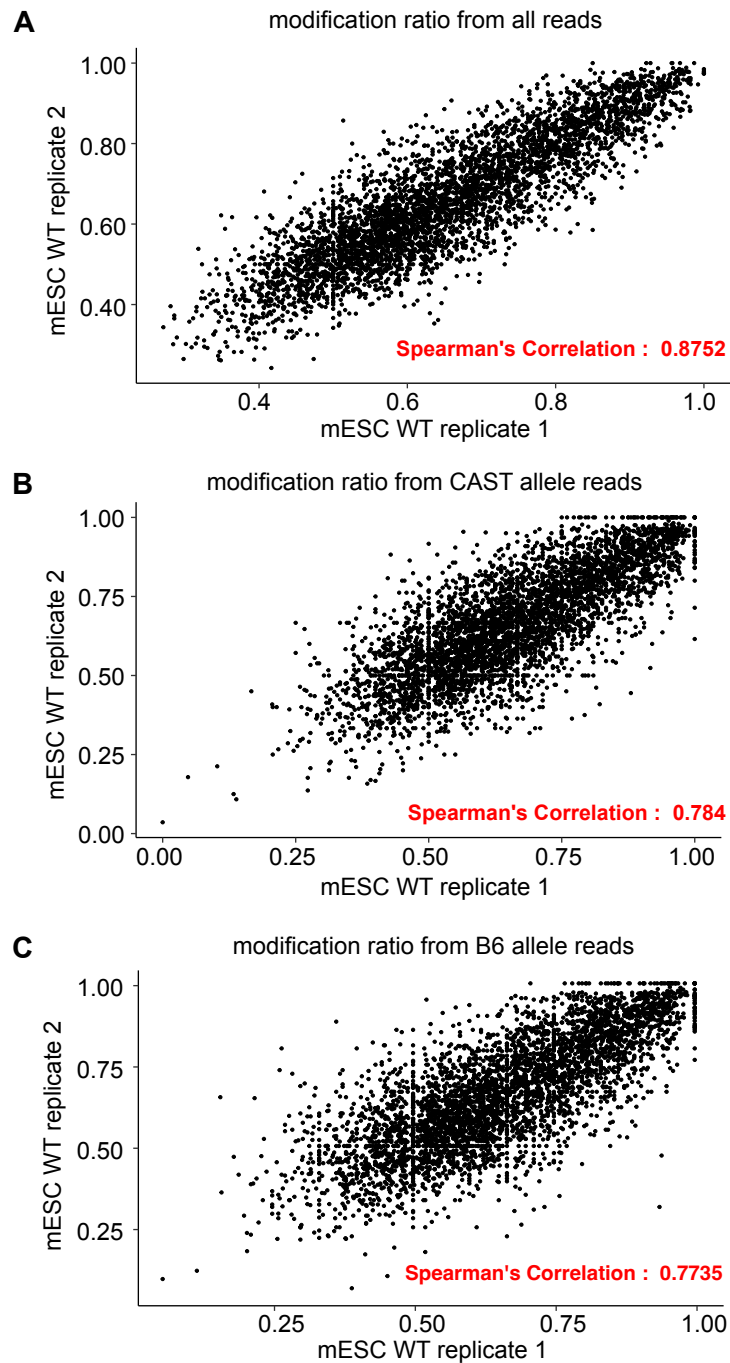

**Supplemental Figure. 3 | Correlations of modification ratios between replicates**

Spearman's correlations were measured for modification ratios calculated using all reads (A), CAST allele reads (B), and B6 allele reads (C).
