# Supplementary material for: Long-read RNA sequencing reveals allele-specific N 6 -methyladenosine modifications
Source: HighWire-hosted journal article supplement (doi:10.1101/gr.279270.124), 2024-10-29
Supplement: Supplemental_Fig_5.pdf [file Supplemental_Fig_5.pdf]

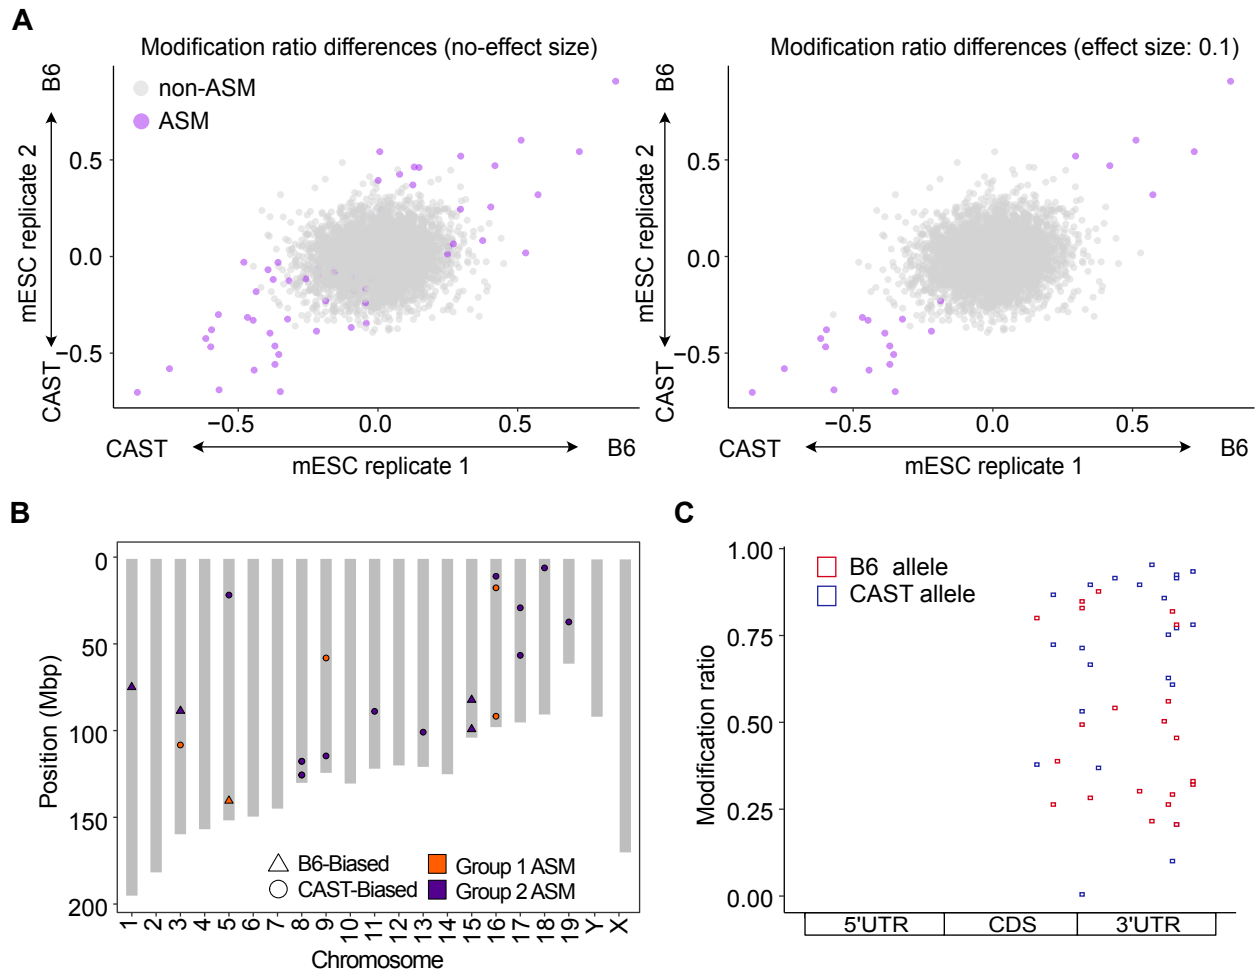

**Supplemental Figure. 5 | Characterization of ASM sites**

A) Comparison of ASM determinations methods using no-effect size (left) or 0.1 (right; Methods). Non-ASM sites are colored in gray and ASM sites in purple. B) Chromosomal distribution of ASM sites in male hybrid mESCs. C). Gene region distribution and allelic modification ratios on ASM sites. The relative m6A positions within the transcript body were determined. Colors signify the modification ratios for the B6 (orange) and CAST (blue) alleles, highlighting the allelic differences in modification.
