# Supplementary material for: Long-read RNA sequencing reveals allele-specific N 6 -methyladenosine modifications
Source: HighWire-hosted journal article supplement (doi:10.1101/gr.279270.124), 2024-10-29
Supplement: Supplemental_Fig_6.pdf [file Supplemental_Fig_6.pdf]

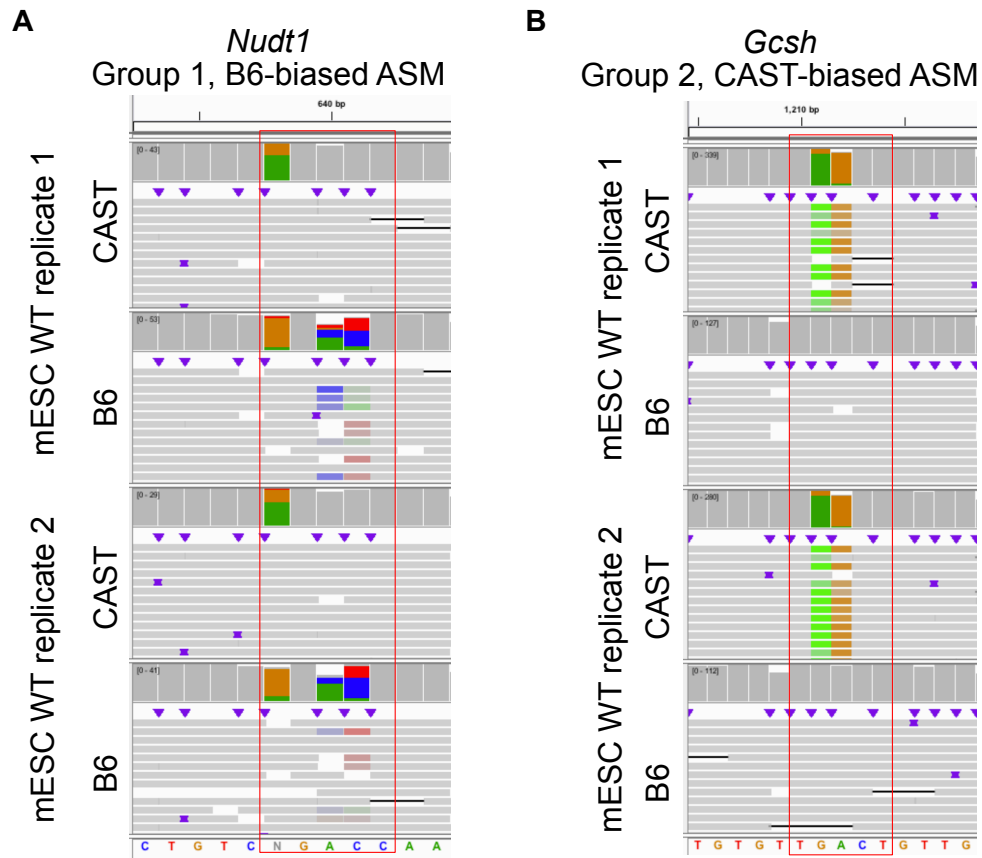

**Supplemental Figure. 6 | Visual detection of ASM from long-read sequencing**

Visualizing base-calling errors in the Integrated Genome Viewer browser confirm the presence of ASM sites. A) *Nudt1* was identified as B6-biased ASM, showing a high-error rate in reads from B6 allele. B) *Gcsh*, classified under Group 2 CAST-biased ASM, demonstrates a high frequent error on reads from CAST allele. The red box represents the DRACH motif.
