# Supplementary material for: Long-read RNA sequencing reveals allele-specific N 6 -methyladenosine modifications
Source: HighWire-hosted journal article supplement (doi:10.1101/gr.279270.124), 2024-10-29
Supplement: Supplemental_Fig_7.pdf [file Supplemental_Fig_7.pdf]

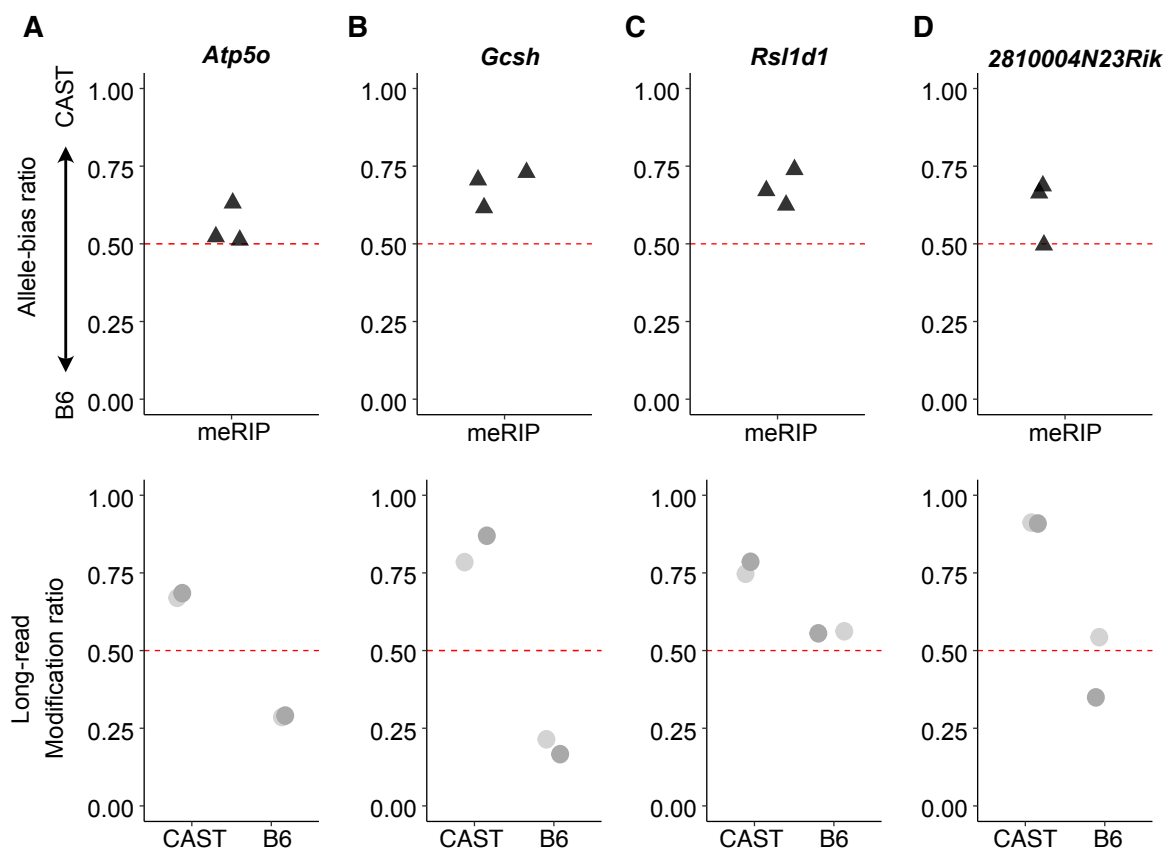

**Supplemental Figure. 7 | Comparison of allele bias ratio from MeRIP-seq and allelic modification ratio from long-read sequencing.**

Five ASM sites (Group 1 (A) and Group 2 (B, C, D)) were detected by both MeRIP-seq and long-read sequencing. Top panels represent allele-bias ratio (proportion of reads from CAST allele) from MeRIP-seq; therefore, a high ratio implies allele bias toward CAST allele and low ratio indicates a bias toward B6 allele. The points in the bottom plot indicate the modification ratio of each allele obtained from long-read sequencing, with gray gradient pairs representing data from two replicates.
