# Supplementary material for: Long-read RNA sequencing reveals allele-specific N 6 -methyladenosine modifications
Source: HighWire-hosted journal article supplement (doi:10.1101/gr.279270.124), 2024-10-29
Supplement: Supplemental_Fig_8.pdf [file Supplemental_Fig_8.pdf]

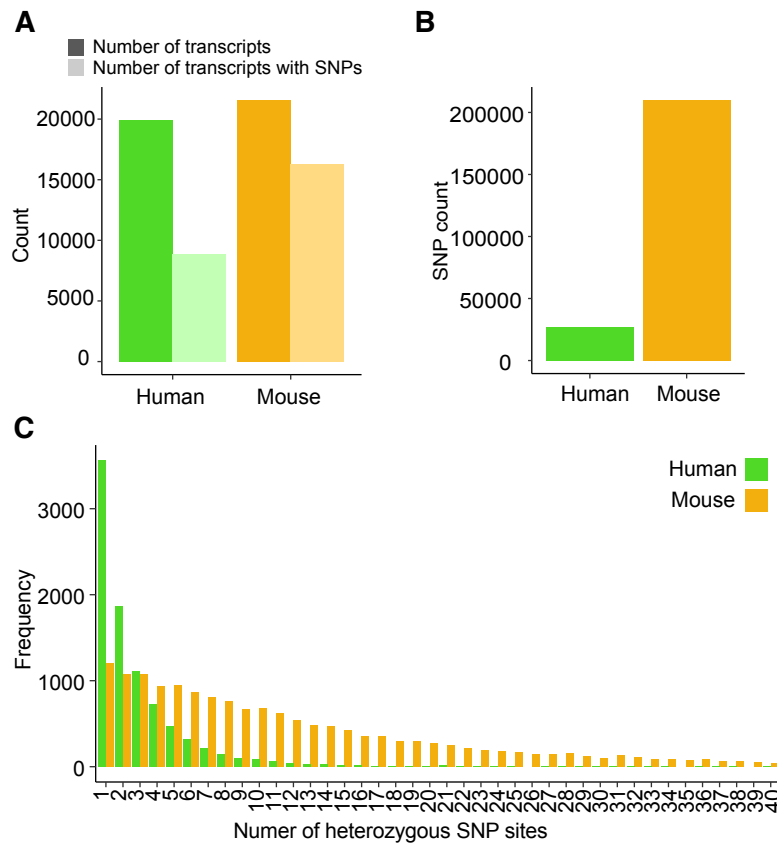

**Supplemental Figure. 8 | SNP counts in hybrid mESCs (C57BL/6J x CAST/EiJ) and NA12878.**

A) The number of transcripts between the two species was similar; however, transcripts with SNPs were significantly fewer in the NA12878 cell line. B) The number of heterozygous SNPs was significantly lower in NA12878, representing only one-tenth of the hybrid mESCs. C) Among the reads with at least one SNPs, 61% of NA12878 reads contained one or two SNPs per read, whereas 87% of the reads had more than two SNPs per read in hybrid mESCs.
