# Supplementary material for: Long-read RNA sequencing reveals allele-specific N 6 -methyladenosine modifications
Source: HighWire-hosted journal article supplement (doi:10.1101/gr.279270.124), 2024-10-29
Supplement: Supplemental_Fig_11.pdf [file Supplemental_Fig_11.pdf]

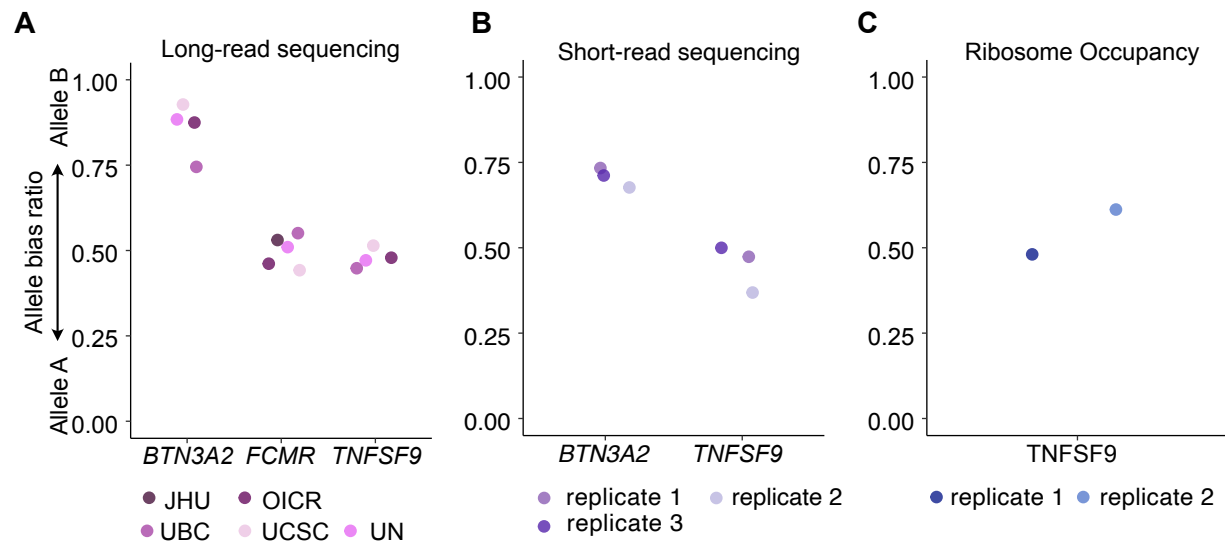

**Supplemental Figure. 11 | Allele specific RNA expression and ribosome occupancy of genes with ASM sites from NA12878**

Allele bias ratio of genes with ASM sites in NA12878. The allele bias ratio was calculated as [Allele B read counts / (Allele A read counts + Allele B read counts)]. Allele-specific RNA expression was measured from long-read (A) and short-read (B) sequencing. The allele-specific ribosome occupancy was detected by ribosome profiling (C).
