# Supplementary material for: Long-read RNA sequencing reveals allele-specific N 6 -methyladenosine modifications
Source: HighWire-hosted journal article supplement (doi:10.1101/gr.279270.124), 2024-10-29
Supplement: Supplemental_Fig_14.pdf [file Supplemental_Fig_14.pdf]

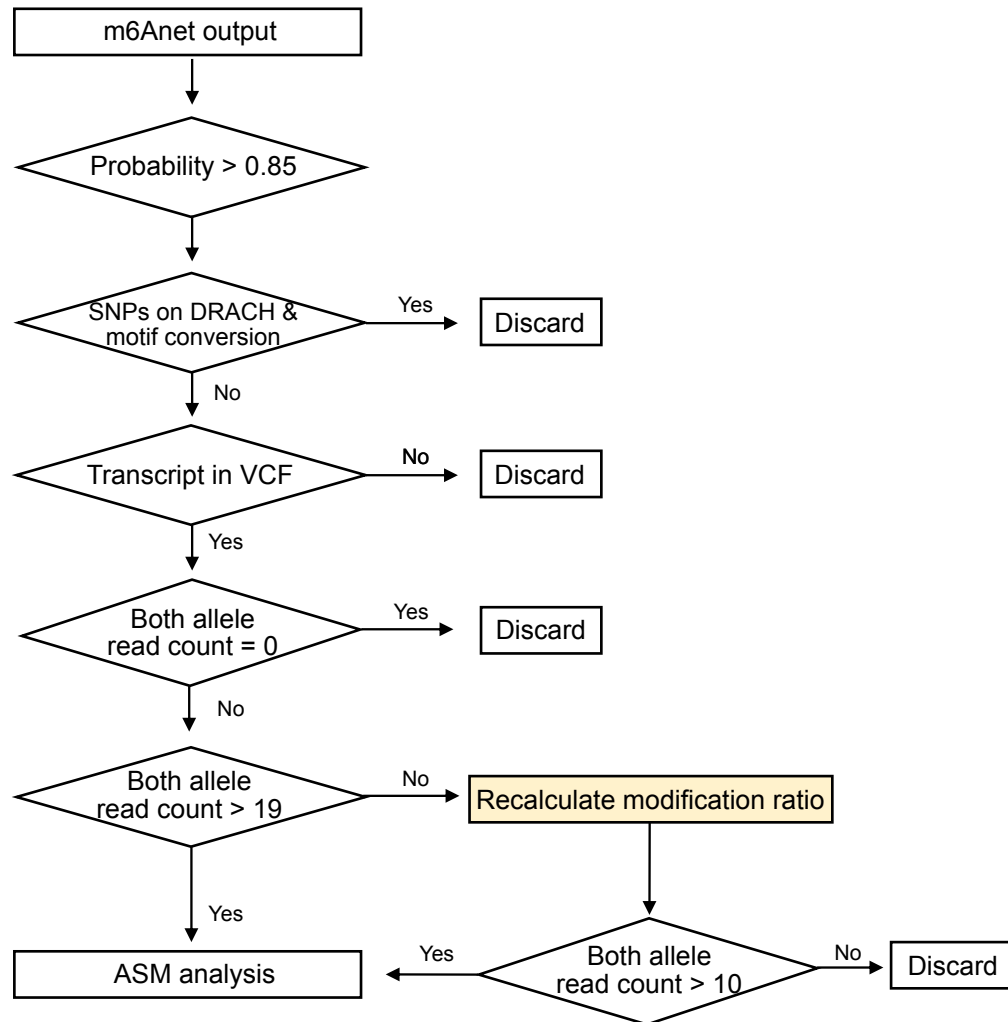

**Recalculation method:**

$$\text{Allele A modification ratio} = \frac{(\text{All read count} * \text{mod ratio from all reads}) - (\text{Allele B read count} * \text{Allele B mod ratio})}{\text{Allele A read count}}$$

**Supplemental Figure. 14 | Data processing flowchart**
