# Supplementary material for: Long-read RNA sequencing reveals allele-specific N 6 -methyladenosine modifications
Source: HighWire-hosted journal article supplement (doi:10.1101/gr.279270.124), 2024-10-29
Supplement: Supplemental_Table_1.xlsx [file Supplemental_Table_1.xlsx]

## Sheet: S_Table1
Supplementary Table 1 | Primer sequences used for Mettl3 knockout cell generation
primer name	Sequence
Mettl3_sgRNA	uaggcacgggacuaucacua
gDNA_mettl3_F	AGTTACAAGAGTAGGATG
gDNA_mettl3_R	ATTTAAGGAACCCAGAAG
