# Supplementary material for: Long-read RNA sequencing reveals allele-specific N 6 -methyladenosine modifications
Source: HighWire-hosted journal article supplement (doi:10.1101/gr.279270.124), 2024-10-29
Supplement: Supplemental_Table_2.xlsx [file Supplemental_Table_2.xlsx]

## Sheet: S_Table2
Supplemental Table 2 | mESC read counts from allelic read assignments
library name	CAST read count	B6 read count	Undefined read count
mESC_WT_replicate1	557787	564944	489529
mESC_WT_replicate2	443131	444514	348184
mESC_Mettl3_KO	189556	187774	168267
