# Supplementary material for: Long-read RNA sequencing reveals allele-specific N 6 -methyladenosine modifications
Source: HighWire-hosted journal article supplement (doi:10.1101/gr.279270.124), 2024-10-29
Supplement: Supplemental_Table_3.xlsx [file Supplemental_Table_3.xlsx]

## Sheet: S_Table3
Supplemental Table 3 | m6A enrichment in gene regions
The high probability of modification in the 3’UTR has a significant enrichment. In the higher coverage (read counts >40) m6A sites, the m6A enrichment was even significant. These findings suggest that m6A modifications are more likely to occur in the 3’UTR, even when considering sites with sufficient coverage.
	m6A site counts	UTR5	CDS	UTR3
All potential sites (rep1)	230433	4347	125585	100501
		0.0189	0.545	0.4361
All potential sites (rep2)	219252	4687	127907	86658
		0.0214	0.5834	0.3952
Probability>0.85 sites (rep1)	14609	141	5070	9398
		0.0097	0.347	0.6433
Probability>0.85 sites (rep2)	13542	153	5019	8370
		0.0113	0.3706	0.6181
Read>40 all potential sites (rep1)	135303	2468	76077	56758
		0.0182	0.5623	0.4195
Read>40 all potential sites (rep2)	123107	2515	73888	46704
		0.0204	0.6002	0.3794
Read>40 & Probability>0.85 sites (rep1)	7270	62	2217	4991
		0.0085	0.305	0.6865
Read>40 & Probability>0.85 sites (rep2)	6262	54	2047	4161
		0.0086	0.3269	0.6645
