# Supplementary material for: Long-read RNA sequencing reveals allele-specific N 6 -methyladenosine modifications
Source: HighWire-hosted journal article supplement (doi:10.1101/gr.279270.124), 2024-10-29
Supplement: Supplemental_Table_4.xlsx [file Supplemental_Table_4.xlsx]

## Sheet: S_Table3
Supplemental Table 4 | Allele specific m6A modification (ASM) sites information
Gene	Transcrip id	m6A position	B6 read count (rep1)	B6 mod ratio (rep1)	CAST read count (rep1)	CAST mod ratio (rep1)	B6 read count (rep2)	B6 mod ratio (rep2)	CAST read count (rep2)	CAST mod ratio (rep2)	Adjusted p-value	Effect size
2810004N23Rik	ENSMUST00000034465.8	1346	135	0.911111	94	0.542553	131	0.908397	80	0.35	4.10762e-05	0.1
Armc10	ENSMUST00000072896.12	1170	38	0	47	0.851064	28	0.0357143	35	0.942857	4.10762e-05	0.1
Armc10	ENSMUST00000072896.12	1624	39	0.897436	53	0.301887	33	0.636364	35	0.257143	4.10762e-05	0.1
Atmin	ENSMUST00000109099.3	4453	50	0.78	21	0.333333	24	0.791667	26	0.461538	0.0351329	0.1
Atp5o	ENSMUST00000023677.9	777	410	0.670732	422	0.28436	366	0.685792	384	0.289062	4.10762e-05	0.1
Ccnb1	ENSMUST00000072119.14	1470	271	0.715867	252	0.496032	208	0.764423	217	0.37788	4.10762e-05	0.1
Cmtm7	ENSMUST00000035009.15	591	38	0.894737	31	0.451613	98	0.877551	38	0.289474	4.10762e-05	0.1
Dgcr2	ENSMUST00000012152.12	3682	32	0.9375	28	0.321429	27	0.962963	26	0.538462	4.10762e-05	0.1
Dnpep	ENSMUST00000066668.13	1287	61	0.377049	49	0.795918	59	0.271186	58	0.741379	0.000294068	0.1
Gcsh	ENSMUST00000040484.5	1211	230	0.773913	112	0.205357	180	0.866667	102	0.176471	4.10762e-05	0.1
Glmp	ENSMUST00000177005.7	1308	32	0.53125	29	0.827586	27	0.333333	34	0.852941	0.00107792	0.1
Gnpat	ENSMUST00000034466.9	1888	75	0.866667	41	0.268293	55	0.781818	35	0.314286	4.10762e-05	0.1
Kif11	ENSMUST00000012587.3	4336	49	0.612245	45	0.288889	35	0.6	29	0.275862	0.0572988	0.1
Kif5b	ENSMUST00000025083.13	4766	24	0.958333	33	0.212121	27	0.962963	34	0.382353	4.10762e-05	0.1
L3mbtl2	ENSMUST00000023029.14	3081	39	0.102564	51	0.823529	47	0.212766	45	0.755556	4.10762e-05	0.1
Nudt1	ENSMUST00000050205.11	639	38	0.368421	42	0.880952	23	0.304348	32	0.90625	4.10762e-05	0.1
Pml	ENSMUST00000085673.10	2377	27	0.740741	23	0.391304	21	0.761905	16	0.0625	4.10762e-05	0.1
Psrc1	ENSMUST00000102629.7	1465	43	0.627907	27	0.259259	31	0.677419	14	0.214286	0.068711	0.1
Rsl1d1	ENSMUST00000119953.1	1773	262	0.748092	294	0.561224	187	0.786096	187	0.55615	4.10762e-05	0.1
Stk38	ENSMUST00000119274.2	2863	41	0.926829	50	0.46	22	0.863636	31	0.548387	4.10762e-05	0.1
Tmbim6	ENSMUST00000023749.14	2019	68	0.205882	95	0.778947	93	0.408602	92	0.728261	4.10762e-05	0.1
Trim25	ENSMUST00000107896.9	4580	24	0.916667	18	0.0555556	34	0.794118	22	0.0909091	4.10762e-05	0.1
Uhrf1	ENSMUST00000001258.14	3221	98	0.857143	219	0.502283	133	0.887218	250	0.38	4.10762e-05	0.1
Afg3l1	ENSMUST00000001520.12	2315	56	0.821429	24	0.833333	33	0.757576	17	1	0.0251533	0
Canx	ENSMUST00000179865.7	1654	74	0.932432	50	0.72	64	0.84375	67	0.746269	0.0974597	0
Cct4	ENSMUST00000173867.7	1875	586	0.711604	628	0.638535	423	0.725768	389	0.609254	0.0368143	0
Cdca4	ENSMUST00000062092.6	1088	23	0.695652	20	0.6	18	0.888889	23	0.521739	0.0626191	0
Cdt1	ENSMUST00000006760.2	1879	255	0.576471	143	0.363636	235	0.591489	98	0.530612	0.00575	0
Cmc1	ENSMUST00000044220.10	528	31	1	22	0.681818	25	0.84	14	0.714286	0.0467089	0
Dnaja1	ENSMUST00000164233.7	1469	248	0.733871	182	0.648352	140	0.771429	132	0.590909	0.0795235	0
Echdc2	ENSMUST00000052999.12	1161	40	0.625	53	0.754717	51	0.411765	56	0.875	4.10762e-05	0
Erp29	ENSMUST00000130451.1	815	66	0.621212	48	0.875	69	0.768116	39	0.820513	0.0806772	0
Fam114a2	ENSMUST00000020831.12	1828	23	0.478261	34	0.882353	20	0.55	31	0.806452	0.0626191	0
Flnb	ENSMUST00000052678.8	8175	32	0.5	24	0.458333	55	0.745455	45	0.4	0.038877	0
G3bp1	ENSMUST00000018727.3	1811	235	0.87234	268	0.783582	240	0.916667	253	0.814229	0.0569558	0
G3bp1	ENSMUST00000018727.3	2592	113	0.902655	118	0.745763	121	0.834711	116	0.767241	0.0763748	0
Gnpat	ENSMUST00000034466.9	2583	68	0.529412	40	0.825	43	0.488372	30	0.733333	0.0725022	0
Map1s	ENSMUST00000019405.3	2278	31	0.451613	24	0.458333	27	0.222222	17	0.764706	0.0185177	0
Morc3	ENSMUST00000202261.4	2387	37	0.837838	27	0.444444	23	0.826087	33	0.757576	0.0590983	0
Ntmt1	ENSMUST00000041830.9	1026	25	1	48	0.625	23	0.913043	34	0.794118	4.10762e-05	0
Pgd	ENSMUST00000084124.6	1891	87	0.390805	143	0.468531	59	0.169492	126	0.595238	4.10762e-05	0
Prkag1	ENSMUST00000168846.2	1230	22	0.954545	27	0.518519	22	0.681818	18	0.5	0.00803	0
Psat1	ENSMUST00000025542.9	1547	290	0.848276	153	0.823529	245	0.922449	178	0.808989	0.054995	0
Psmb1	ENSMUST00000014913.10	754	356	0.702247	289	0.546713	269	0.635688	227	0.555066	0.00738847	0
Psmd8	ENSMUST00000059642.16	1346	95	0.526316	116	0.775862	95	0.610526	135	0.622222	0.015363	0
Rrm2	ENSMUST00000020980.11	1633	249	0.554217	174	0.511494	208	0.605769	171	0.438596	0.0795235	0
Rrp12	ENSMUST00000038677.4	4113	37	0.72973	25	1	29	0.827586	28	0.892857	0.00497627	0
Sall4	ENSMUST00000029061.11	2483	16	0.625	21	1	32	0.78125	22	0.863636	0.0725022	0
Sgo1	ENSMUST00000024736.13	955	32	0.84375	22	0.272727	26	0.846154	22	0.545455	0.00107792	0
Sppl3	ENSMUST00000031530.8	2458	27	0.888889	22	0.409091	27	0.62963	20	0.6	0.0182945	0
Tbc1d10b	ENSMUST00000120705.2	2461	18	0.166667	23	0.695652	20	0.45	32	0.46875	0.0221768	0
Tmed9	ENSMUST00000109905.4	771	30	0.933333	33	0.575758	23	0.956522	27	0.925926	0.0268026	0
Tmsb10	ENSMUST00000114049.1	609	51	0.72549	47	0.680851	45	0.933333	49	0.693878	0.0806772	0
Tmx2	ENSMUST00000111665.7	2151	48	0.541667	33	0.666667	48	0.4375	26	0.807692	0.0725022	0
Trim59	ENSMUST00000107802.7	2064	40	0.925	63	0.666667	40	0.775	44	0.659091	0.054995	0
Twf2	ENSMUST00000024047.11	1265	44	0.590909	49	0.591837	42	0.333333	33	0.727273	0.0417397	0
Wtip	ENSMUST00000038537.8	1542	50	0.46	56	0.607143	40	0.325	28	0.785714	0.0112072	0
