# Supplementary material for: Long-read RNA sequencing reveals allele-specific N 6 -methyladenosine modifications
Source: HighWire-hosted journal article supplement (doi:10.1101/gr.279270.124), 2024-10-29
Supplement: Supplemental_Table_6.xlsx [file Supplemental_Table_6.xlsx]

## Sheet: S_Table5
Supplemental Table 6 | Comparison of allelic read count from MeRIP-seq and allelic modification ratio from long-read sequencing
Gene name	meRIP-seq		long-read		ASM classification
	CAST read count	B6 read count	CAST mod ratio	B6 mod ratio
Atp5o	628	554	0.678262	0.286711	Group 1
Ddx20	27	19	0.730303	0.441558	Group 1
Dgcr2	4	4	0.950231	0.429945	Group 1
Gnpat	4	2	0.824242	0.291289	Group 1
Nudt1	10	10	0.336384	0.893601	Group 1
Pml	6	4	0.751323	0.226902	Group 1
Psrc1	8	2	0.652663	0.236772	Group 1
2810004N23Rik	28	16	0.909754	0.446277	Group 2
Armc_1170	8	4	0.0178571	0.89696	Group 2
Atmin	2	0	0.785833	0.397436	Group 2
Cmtm7	0	4	0.886144	0.370543	Group 2
Dnpep	4	4	0.324118	0.768649	Group 2
Gcsh	667	274	0.82029	0.190914	Group 2
Glmp	4	6	0.432292	0.840264	Group 2
Kif11	9	2	0.606122	0.282375	Group 2
L3mbtl2	4	14	0.157665	0.789542	Group 2
Rsl1d1	79	42	0.767094	0.558687	Group 2
Stk38	4	18	0.895233	0.504194	Group 2
Tmbim6	4	0	0.307242	0.753604	Group 2
Trim25	0	2	0.855392	0.0732323	Group 2
