# Supplementary material for: Long-read RNA sequencing reveals allele-specific N 6 -methyladenosine modifications
Source: HighWire-hosted journal article supplement (doi:10.1101/gr.279270.124), 2024-10-29
Supplement: Supplemental_Table_8.xlsx [file Supplemental_Table_8.xlsx]

## Sheet: S_Table6
Supplemental Table 8 | Read counts from allele read assignments of NA12878 cell lines
library name	Allele A read count	Allele B read count	Undefined read count
NA12878_JHU	43672	45040	85470
NA12878_OICR	101535	103916	182694
NA12878_UBC	151507	154809	323975
NA12878_UCSC	164468	167751	309532
NA12878_UN	136366	140170	253752
