# Supplementary material for: Long-read RNA sequencing reveals allele-specific N 6 -methyladenosine modifications
Source: HighWire-hosted journal article supplement (doi:10.1101/gr.279270.124), 2024-10-29
Supplement: Supplemental_Table_9.xlsx [file Supplemental_Table_9.xlsx]

## Sheet: S_Table8
Supplementary Table 9 | Genomic PCR primer list
Primer name	Sequence
2810004N23Rik_F	AGACCCTGTGGAACAAGAAAG
2810004N23Rik_R	CTGTCAAGAGGAGCTTGGAAA
Armc10_F	CTTCCGAGGATGTGGATCATTTA
Armc10_R	ATCTATGTACCCTAGTCCCAGTC
Atp5o_F	CCCTCTGTTCAGGAAGCA
Atp5o_R	AAGACGGTGCTGAAGAG
Ccnb1_F1	CCCTGGAAGAGCTACTATGAATG
Ccnb1_R1	ATCATCATGTCTTCTGCCTCAC
Cmtm7_F	TGCTGCAATTGACATTTTATTA
Cmtm7_R	TGCATGCTTGTGATCTC
Dgcr2_F	TAAGGCTGCACCTAGAGC
Dgcr2_R	ATCTGAACTGCTTCTGGGG
Dnpep_F	CCAAGGCAGATGGCACTAAT
Dnpep_R	GTCCAGATTCCCACAGTCAAA
Glmp_F	CTACCTTTGCTGGTAAGAAC
Glmp_R	CCACACTGCACATCCATACAA
Kif5b_F1	AAGCTGACAGCCATCCATC
Kif5b_R1	CTAACCTCTATTCCTTGGGATTGT
Kif5b_F2	AAACAACATATTCCACAGGTAGAC
Kif5b_R2	GCCATAGTCAGAAGACTCAGAT
L3mbtl2_F	TCTGGCTGGCACTCATTG
L3mbtl2_R	GTTTAGAATCTGCATGGGCT
Nudt1_F	GTAACAGGGCTCTGCATTCAA
Nudt1_R	AGTAGCCGGAGTGTGAG
Psrc1_F	CACAGTCCTCAGCTAGCA
Psrc1_R	TAGTGTTAACAGCAGTTACAGC
Rsl1d1_F	TGTAGGCCAGGCTCAAATG
Rsl1d1_R	GTTTGCGTGGGTCAAAGATG
Tmbim6_F	CTGGGTTTGTTCACCTGTTTC
Tmbim6_R	AAAGCCTGTTAGGCATCTTAGT
Trim25_F	TGGGACACTGATGAGGGATAA
Trim25_R	GGTCTAGATGGGTCTCGAG
Uhrf1_F	CAAGCAGAAGTCCACAGGTAG
Uhrf1_R	AATGGTGGGTGACAGAAGTTAG
